# Supplementary material for: Area Gene Regulates the Synthesis of β-Glucan with Antioxidant Activity in the Aureobasidium pullulans
Source: MDPI journal article supplement (doi:10.3390/foods12030660), 2023-02-03
Supplement: s1 [file s1]

**Figure S1**

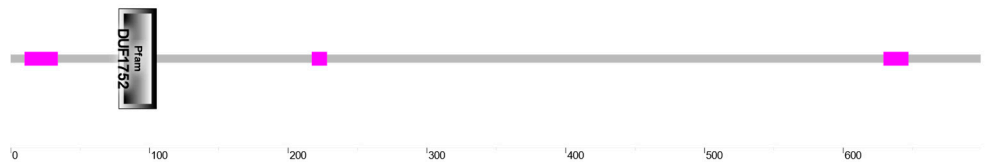

**Figure S1.** The conserved domain of Area of *A. pullulans*.

**Table S1**

**Table S1.** primers used in this study.

| Primers | Sequence                                               |
|---------|--------------------------------------------------------|
| AreaF2  | 5'-ATGACATCGCCGCGCACCTTTGC-3'                          |
| AreaR2  | 5'-TCAGCGGACGTACGACGCCGT-3'                            |
| EGFPF1  | 5'-AGCTGTACAAGTAAGAATTCATGACATCGCCGCGCACCTTTGC-3'      |
| EGFPR1  | 5'-GTACCGGGCCCCCCTCGAGTCAGCGGACGTACGACGCCGT-3'         |
| pBEGFPF | 5'-TCGACCTCGACTCTAGAGGATCC-3'                          |
| pBEGFPR | 5'-TCAGCGGACGTACGACGCCGT-3'                            |
| PSTF    | 5'-GGCTCATTCGTATCCTCCAGCAAGCTTGACTGTCTCAGCTGTGCAA-3'   |
| PSTR    | 5'-CCCAAGCATCGATACCGTCGACCTCGAGTCTTCTTCGACGACCTCTTC-3' |
| PSTF1   | 5'-GAACGGCAGATCTTCGCATGCGACTGTCTCAGCTGTGCAA-3'         |
| PSTR1   | 5'-CGGGGCCAGGTACCACAGGCCTTCTTCTTCGACGACCTCTTC-3'       |
| PSF     | 5'-TTTATTTAGATTCAATCTGACTTACCTAT-3'                    |
| PSR     | 5'-AGATTCGTCAAGCTGTTTGATGATTCAGT-3'                    |
| ITS1    | 5'-TCCGTAGGTGAACCTGCGG-3'                              |
| ITS4    | 5'-TCCTCCGCTTATTGATATGC-3'                             |
| hygF    | 5'-CTCCATACAAGCCAACCAC-3'                              |
| hygR    | 5'-GAAAAAGCCTGAACTCACC-3'                              |
